# Supplementary material for: Temporal Dynamics of ADSC Therapy in Skin Fibrosis: Unraveling the Roles of ROS/NF-κB/TSG-6 Signaling Axis
Source: Research Square preprint supplement (doi:10.21203/rs.3.rs-7098189/v1), 2025-07-22
Supplement: Supplementary file 1 [file c0c3034e6c5e2fb047e7422c.docx]

Supplementary Table S1.

| Primer name | Species |  | Primer sequences |
| --- | --- | --- | --- |
| α-SMA | Mus musculus | Forward | CATCACCATCGGGAATGAAC |
|  | Reverse | GGCGTACAGGTCTTTGCGGTA |
| TNF-α | Forward | GAAAACAACCCTCAGACGCC |
|  | Reverse | CGATCACTCCAAAGTGCAGC |
| IL-6 | Forward | GGCCCTTGCTTTCTCTTCG |
|  | Reverse | ATAATAAAGTTTTGATTATGT |
| β-actin | Forward | GGCTGTATTCCCCTCCATCG |
|  | Reverse | CCAGTTGGTAACAATGCCATGT |
| TSG-6 | Homo sapien | Forward | TGGAGCTGCAAGTGTTTGTG |
|  | Reverse | CCAGGTGCTGGTACTTGTCC |
| GAPDH | Forward | GGAGCGAGATCCCTCCAAAAT, |
|  | Reverse | GGCTGTTGTCATACTTCTCATGG |

Primer sequences used in the study

| Target Position | Target Sequence | shRNA Sense Strand (5'→3')​ | Vector Restriction Sites |
| --- | --- | --- | --- |
| CDS-1​​ | GCCGATGCATGTCTAAACT | CCGGGCCGATGCATGTCTAAACTCTCGAGAGTTTAGACATGCATCGGCGTTTTTG | AgeI/EcoRI |

Knockdown shRNA sequences

| Antibodies | Source | kDa |
| --- | --- | --- |
| NOX4 | Abcam,USA | 66 |
| p-IκBa | 40 |
| IκBa | 40 |
| NF-κb | 65 |
| TSG-6 | 37 |
| TGF-β | 13 |
| p-Smad2/3 | 53 |
| Smad2/3 | 55 |
| Lamin A/C | 74 |
| GAPDH | 36 |

The approximate molecular weights (kDa) of proteins in Western Blot analysis are as follows
